# Supplementary material for: Vaccine value profile for norovirus
Source: PubMed Central journal article supplement (PMC10710898; doi:10.1016/j.vaccine.2023.03.034), 2023-10-06
Supplement: NIHMS1947006-supplement-Suppl_Table_1.pdf [file NIHMS1947006-supplement-Suppl_Table_1.pdf]

**Supplementary Table 1: Framework to inform vaccine development**

| <b>Themes Considered</b>      | <b>Indicators</b>                                                           | <b>Very Low</b>                                                                                                                                                                                  | <b>Low</b>                                                                                                                                               | <b>Moderate</b>                                                                                                                                | <b>High</b>                                                                                                                                                                                    | <b>Very High</b>                                                                                                                                                                                                     |
|-------------------------------|-----------------------------------------------------------------------------|--------------------------------------------------------------------------------------------------------------------------------------------------------------------------------------------------|----------------------------------------------------------------------------------------------------------------------------------------------------------|------------------------------------------------------------------------------------------------------------------------------------------------|------------------------------------------------------------------------------------------------------------------------------------------------------------------------------------------------|----------------------------------------------------------------------------------------------------------------------------------------------------------------------------------------------------------------------|
| <b>Biological Feasibility</b> | Most advanced vaccine candidate(s)                                          | <ul style="list-style-type: none"> <li>• Ph1, or preclinical, or no candidates in the pipeline</li> </ul>                                                                                        | <ul style="list-style-type: none"> <li>• Ph2 candidate</li> </ul>                                                                                        | <ul style="list-style-type: none"> <li>• Ph3 candidate</li> </ul>                                                                              | <ul style="list-style-type: none"> <li>• Ph3 candidate with high likelihood of licensure by a WHO-listed national regulatory authority</li> </ul>                                              | <ul style="list-style-type: none"> <li>• Licensed vaccine by a WHO-listed national regulatory authority</li> </ul>                                                                                                   |
| <b>Biological Feasibility</b> | Existence of immunity from natural exposure                                 | <ul style="list-style-type: none"> <li>• No evidence that natural exposure confers immunity</li> </ul>                                                                                           | <ul style="list-style-type: none"> <li>• Conflicting or minimum evidence</li> </ul>                                                                      | <ul style="list-style-type: none"> <li>• Some evidence and/or immunity of limited duration</li> </ul>                                          | <ul style="list-style-type: none"> <li>• Good evidence of relatively long-lasting immunity</li> </ul>                                                                                          | <ul style="list-style-type: none"> <li>• Well established that natural exposure confers protects against severe disease (or indicated vaccine outcome) with durable immunity</li> </ul>                              |
| <b>Biological Feasibility</b> | Understanding mechanisms of immunity                                        | <ul style="list-style-type: none"> <li>• Mechanisms of pathogen induced immunity unknown</li> </ul>                                                                                              | <ul style="list-style-type: none"> <li>• Very limited or conflicted understanding of pathogen-induced immunity and/or immune-enhanced disease</li> </ul> | <ul style="list-style-type: none"> <li>• Some understanding of pathogen-induced immunity and whether immune-enhanced disease exists</li> </ul> | <ul style="list-style-type: none"> <li>• Good understanding of pathogen-induced immunity, however some mechanisms remain unclear; evidence that immune-enhanced disease is unlikely</li> </ul> | <ul style="list-style-type: none"> <li>• All mechanisms of pathogen-induced immunity are well understood; robust evidence that immune-enhanced disease is rare</li> </ul>                                            |
| <b>Biological Feasibility</b> | Likelihood of vaccine protection against the majority of pathogenic strains | <ul style="list-style-type: none"> <li>• Evidence that a vaccine would not protect against majority of pathogenic strains, or gap in evidence of that a vaccine would protect against</li> </ul> | <ul style="list-style-type: none"> <li>• Limited evidence that a vaccine would protect against majority of pathogenic strains</li> </ul>                 | <ul style="list-style-type: none"> <li>• Some evidence that a vaccine would protect against majority of pathogenic strains</li> </ul>          | <ul style="list-style-type: none"> <li>• Strong evidence that a vaccine would protect against majority of pathogenic strains</li> </ul>                                                        | <ul style="list-style-type: none"> <li>• No known strain variation that is relevant to a vaccine OR evidence that a vaccine will protect against all known strains OR new strain can be rapidly developed</li> </ul> |

|                                        |                                                                |                                                                                                                                |                                                                                                                                  |                                                                                                                                                                                 |                                                                                                                                                                                                                     |                                                                                                                                                                                                      |
|----------------------------------------|----------------------------------------------------------------|--------------------------------------------------------------------------------------------------------------------------------|----------------------------------------------------------------------------------------------------------------------------------|---------------------------------------------------------------------------------------------------------------------------------------------------------------------------------|---------------------------------------------------------------------------------------------------------------------------------------------------------------------------------------------------------------------|------------------------------------------------------------------------------------------------------------------------------------------------------------------------------------------------------|
|                                        |                                                                | majority of pathogenic strains                                                                                                 |                                                                                                                                  |                                                                                                                                                                                 |                                                                                                                                                                                                                     |                                                                                                                                                                                                      |
| <b>Product Development Feasibility</b> | Existence of animal models to facilitate vaccine development   | <ul style="list-style-type: none"> <li>• Animal models do not exist and no progress has been made to identify them</li> </ul>  | <ul style="list-style-type: none"> <li>• Animal models do not exist but some progress has been made to identify them</li> </ul>  | <ul style="list-style-type: none"> <li>• Animal models are identified but their utility have not been confirmed</li> </ul>                                                      | <ul style="list-style-type: none"> <li>• Animal models are identified and used but the mechanisms of immunity are unclear</li> </ul>                                                                                | <ul style="list-style-type: none"> <li>• Animal models are well defined and used and mechanisms of immunity are well understood OR animal models are not required for vaccine development</li> </ul> |
| <b>Product Development Feasibility</b> | Existence of in vitro assays to facilitate vaccine development | <ul style="list-style-type: none"> <li>• In vitro assays do not exist and no progress has been made to develop them</li> </ul> | <ul style="list-style-type: none"> <li>• In vitro assays do not exist but some progress has been made to develop them</li> </ul> | <ul style="list-style-type: none"> <li>• In vitro assays are developed but their utility has not been established or the assays have not been analytically qualified</li> </ul> | <ul style="list-style-type: none"> <li>• In vitro assays are analytically qualified and used but their fit for purpose as a relevant biomarker for decision-making or licensure has not been established</li> </ul> | <ul style="list-style-type: none"> <li>• In vitro assays are qualified/validate and are fit-for-purpose for decision-making or licensure</li> </ul>                                                  |

|                                               |                                                        |                                                                                                                                                                                                                                                                      |                                                                                                                                                                                                                                    |                                                                                                                                                                                          |                                                                                                                                                                                |                                                                                                                                                                                                                           |
|-----------------------------------------------|--------------------------------------------------------|----------------------------------------------------------------------------------------------------------------------------------------------------------------------------------------------------------------------------------------------------------------------|------------------------------------------------------------------------------------------------------------------------------------------------------------------------------------------------------------------------------------|------------------------------------------------------------------------------------------------------------------------------------------------------------------------------------------|--------------------------------------------------------------------------------------------------------------------------------------------------------------------------------|---------------------------------------------------------------------------------------------------------------------------------------------------------------------------------------------------------------------------|
| <p><b>Product Development Feasibility</b></p> | <p>Ease of Clinical Development</p>                    | <ul style="list-style-type: none"> <li>• A complex trial design (no correlate) and a significant investment in clinical sites/infrastructure needed for testing a vaccine OR low disease incidence a significant impediment to efficacy trial feasibility</li> </ul> | <ul style="list-style-type: none"> <li>• A complex trial design needed (no correlate) that may require investment in clinical sites/infrastructure OR low disease incidence requires a large and/or long efficacy trial</li> </ul> | <ul style="list-style-type: none"> <li>• A standard trial design that may require investment in clinical sites/infrastructure</li> </ul>                                                 | <ul style="list-style-type: none"> <li>• Common trial design, potential correlate and a possibility to leverage existing trial infrastructure</li> </ul>                       | <ul style="list-style-type: none"> <li>• Common trial design, established correlate and a possibility to leverage existing trial infrastructure AND high disease incidence allows for an efficacy trial</li> </ul>        |
| <p><b>Product Development Feasibility</b></p> | <p>Availability or need for human challenge models</p> | <ul style="list-style-type: none"> <li>• Human challenge models OR diagnostic tools are important for vaccine development but are not developed</li> </ul>                                                                                                           | <ul style="list-style-type: none"> <li>• Human challenge models OR diagnostic tools are important for vaccine development and some progress has been made to develop them</li> </ul>                                               | <ul style="list-style-type: none"> <li>• Human challenge models OR diagnostic tools are important for vaccine development, are developed but not used or their use is unclear</li> </ul> | <ul style="list-style-type: none"> <li>• Human challenge models OR diagnostic tools would facilitate vaccine development and are developed but their use is limited</li> </ul> | <ul style="list-style-type: none"> <li>• Human challenge models OR diagnostic tools are important for vaccine development, are developed and widely used and accepted, OR no human challenge model is required</li> </ul> |
